# Supplementary material for: DEVOTE 3: temporal relationships between severe hypoglycaemia, cardiovascular outcomes and mortality
Source: PubMed Central journal article supplement (PMC6002964; doi:10.1007/s00125-017-4422-0), 2017-09-15
Supplement: 125_2017_4422_MOESM1_ESM.pdf [file 125_2017_4422_MOESM1_ESM.pdf]

## **DEVOTE 3: temporal relationships between severe hypoglycaemia, cardiovascular outcomes and mortality**

### **Contents**

|                                                                                                                                                     |   |
|-----------------------------------------------------------------------------------------------------------------------------------------------------|---|
| Electronic supplementary material (ESM) Table 1: Baseline characteristics .....                                                                     | 2 |
| ESM Table 2: Sensitivity analyses adjusting for baseline characteristics .....                                                                      | 4 |
| ESM Table 3: Listing of all-cause death occurring after a severe hypoglycaemic event .....                                                          | 5 |
| ESM Fig. 1: Time to first Event Adjudication Committee-confirmed major adverse cardiovascular event and prior severe hypoglycaemia by patient ..... | 8 |

**Electronic supplementary material (ESM) Table 1: Baseline characteristics**

|                                                                                                              | <b>Patients with severe hypoglycaemic events (n=439)</b> | <b>Patients without severe hypoglycaemic events (n=7198)</b> |
|--------------------------------------------------------------------------------------------------------------|----------------------------------------------------------|--------------------------------------------------------------|
| Age (years)                                                                                                  | 66.1±8.1                                                 | 64.9±7.3 <sup>a</sup>                                        |
| Men                                                                                                          | 237 (54.0)                                               | 4541 (63.1)                                                  |
| Ethnicity                                                                                                    |                                                          |                                                              |
| Hispanic or Latino                                                                                           | 52 (11.8)                                                | 1085 (15.1)                                                  |
| Race                                                                                                         |                                                          |                                                              |
| White                                                                                                        | 334 (76.1)                                               | 5441 (75.6)                                                  |
| Black or African American                                                                                    | 62 (14.1)                                                | 770 (10.7)                                                   |
| Asian                                                                                                        | 25 (5.7)                                                 | 751 (10.4)                                                   |
| Other                                                                                                        | 18 (4.1)                                                 | 234 (3.3)                                                    |
| Region                                                                                                       |                                                          |                                                              |
| North America                                                                                                | 348 (79.3)                                               | 4923 (68.4)                                                  |
| Europe                                                                                                       | 26 (5.9)                                                 | 849 (11.8)                                                   |
| South America                                                                                                | 32 (7.3)                                                 | 553 (7.7)                                                    |
| India                                                                                                        | 8 (1.8)                                                  | 349 (4.8)                                                    |
| Asia excluding India                                                                                         | 12 (2.7)                                                 | 280 (3.9)                                                    |
| Africa                                                                                                       | 13 (3.0)                                                 | 244 (3.4)                                                    |
| Diabetes duration (years)                                                                                    | 18.6±9.8                                                 | 16.3±8.8                                                     |
| Smoking status                                                                                               |                                                          |                                                              |
| Current                                                                                                      | 54 (12.3)                                                | 798 (11.1)                                                   |
| Previous                                                                                                     | 195 (44.4)                                               | 3158 (43.9)                                                  |
| Never                                                                                                        | 190 (43.3)                                               | 3240 (45.0)                                                  |
| Renal status                                                                                                 |                                                          |                                                              |
| Normal renal function (eGFR ≥90 ml <sup>-1</sup> min <sup>-1</sup> (1.73 m) <sup>-2</sup> per CKD-EPI)       | 66 (15.3)                                                | 1420 (20.0)                                                  |
| Mild renal impairment (eGFR 60–89 ml <sup>-1</sup> min <sup>-1</sup> (1.73 m) <sup>-2</sup> per CKD-EPI)     | 152 (35.3)                                               | 2966 (41.8)                                                  |
| Moderate renal impairment (eGFR 30–59 ml <sup>-1</sup> min <sup>-1</sup> (1.73 m) <sup>-2</sup> per CKD-EPI) | 192 (44.5)                                               | 2512 (35.4)                                                  |
| Severe renal impairment (eGFR <30 ml <sup>-1</sup> min <sup>-1</sup> (1.73 m) <sup>-2</sup> per CKD-EPI)     | 21 (4.9)                                                 | 193 (2.7)                                                    |
| Trial eligibility stratum                                                                                    |                                                          |                                                              |
| Age ≥50 years and established cardiovascular or chronic kidney disease <sup>b</sup>                          | 390 (88.8)                                               | 6119 (85.0)                                                  |
| Age ≥60 years and risk factors for cardiovascular disease <sup>c</sup>                                       | 46 (10.5)                                                | 1059 (14.7)                                                  |
| Body weight (kg)                                                                                             | 95.8±22.9                                                | 96.1±22.9                                                    |
| Body mass index (kg/m <sup>2</sup> )                                                                         | 34.1±7.1                                                 | 33.6±6.8                                                     |
| Blood pressure (systolic/diastolic, mmHg)                                                                    | 135.0±18.7/<br>74.4±10.4                                 | 135.6±18.0/<br>76.3±10.4                                     |
| Pulse (beats/minute)                                                                                         | 72.0±10.9                                                | 73.2±11.3                                                    |
| HbA <sub>1c</sub> (%)                                                                                        | 8.5±1.7                                                  | 8.4±1.7                                                      |

|                                                                                    |           |           |
|------------------------------------------------------------------------------------|-----------|-----------|
| HbA <sub>1c</sub> (mmol/mol)                                                       | 69.4±18.6 | 68.5±18.0 |
| Fasting plasma glucose (mmol/l)                                                    | 9.4±4.3   | 9.5±3.9   |
| eGFR (ml <sup>-1</sup> min <sup>-1</sup> (1.73 m) <sup>-2</sup> ) based on CKD-EPI | 63.1±22.7 | 68.3±21.4 |
| Total cholesterol (mmol/l)                                                         | 4.2±1.1   | 4.3±1.2   |
| Low-density lipoprotein cholesterol (mmol/l)                                       | 2.2±0.9   | 2.2±1.0   |
| High-density lipoprotein cholesterol (mmol/l)                                      | 1.2±0.4   | 1.2±0.3   |
| Triglycerides (mmol/l)                                                             | 2.0±1.4   | 2.1±1.8   |

Full analysis set (all randomised patients); Data listed are number (proportion [%]) or mean ± standard deviation. Percentage refers to the proportion of patients on degludec or glargine treatment

<sup>a</sup>Including 3 patients with age <50 years

<sup>b</sup>Patients with missing age information or age <50 years, but who fulfilled at least one of the inclusion criteria for established cardiovascular/chronic kidney disease were included

<sup>c</sup>Patients with missing age information and who only fulfilled the inclusion criteria for cardiovascular disease risk factors were not included

CKD-EPI, chronic kidney disease epidemiology collaboration formula; eGFR, estimated glomerular filtration rate

**ESM Table 2: Sensitivity analyses adjusting for baseline characteristics**

|                                              | <b>Hazard ratio (95% CI)</b> | <b>p-value</b> |
|----------------------------------------------|------------------------------|----------------|
| <b>MACE</b>                                  |                              |                |
| Age                                          | 1.01 (1.00, 1.02)            | 0.0958         |
| Sex                                          | 0.82 (0.70, 0.97)            | 0.0202         |
| HbA <sub>1c</sub>                            | 1.15 (1.10, 1.20)            | <0.0001        |
| Body mass index                              | 1.00 (0.99, 1.02)            | 0.5204         |
| Diabetes duration                            | 1.00 (0.99, 1.00)            | 0.3227         |
| Insulin regimen                              | 1.52 (1.19, 1.94)            | 0.0007         |
| Hepatic impairment                           | 1.99 (1.42, 2.79)            | <0.0001        |
| Renal status (eGFR)                          | 0.99 (0.99, 1.00)            | 0.0004         |
| Cardiovascular risk group inclusion criteria | 1.57 (1.19, 2.06)            | 0.0013         |
| <b>All-cause mortality</b>                   |                              |                |
| Age                                          | 1.04 (1.03; 1.06)            | <0.0001        |
| Sex                                          | 0.71 (0.58, 0.88)            | 0.0018         |
| HbA <sub>1c</sub>                            | 1.11 (1.05, 1.18)            | 0.0003         |
| Body mass index                              | 1.01 (1.00, 1.03)            | 0.0611         |
| Diabetes duration                            | 1.00 (0.99, 1.01)            | 0.8854         |
| Insulin regimen                              | 1.33 (0.98, 1.81)            | 0.0711         |
| Hepatic impairment                           | 3.38 (2.43, 4.72)            | <0.0001        |
| Renal status (eGFR)                          | 0.98 (0.98, 0.99)            | <0.0001        |
| Cardiovascular risk group inclusion criteria | 1.19 (0.86, 1.66)            | 0.2945         |

CI, confidence interval; eGFR, estimated glomerular filtration rate; MACE, major adverse cardiovascular event

**ESM Table 3: Listing of all-cause death occurring after a severe hypoglycaemic event**

| Patient | Event                    | Cause of death               | Day of severe hypoglycaemic event | Days from severe hypoglycaemic event to fatal event |
|---------|--------------------------|------------------------------|-----------------------------------|-----------------------------------------------------|
| 1       | Non-cardiovascular death | Infection (including sepsis) | 321                               | 147                                                 |
| 2       | Undetermined cause       |                              | 520                               | 97                                                  |
|         |                          |                              | 519                               | 98                                                  |
| 3       | Cardiovascular death     | Acute myocardial infarction  | 53                                | 596                                                 |
| 4       | Cardiovascular death     | Stroke                       | 71                                | 217                                                 |
| 5       | Non-cardiovascular death | Malignancy                   | 215                               | 156                                                 |
| 6       | Non-cardiovascular death | Infection (including sepsis) | 150                               | 273                                                 |
| 7       | Non-cardiovascular death | Infection (including sepsis) | 658                               | 0                                                   |
| 8       | Cardiovascular death     | Heart failure                | 303                               | 71                                                  |
| 9       | Undetermined cause       |                              | 158                               | 28                                                  |
| 10      | Cardiovascular death     | Heart failure                | 435                               | 18                                                  |
| 11      | Non-cardiovascular death | Renal causes                 | 190                               | 365                                                 |
|         |                          |                              | 178                               | 377                                                 |
|         |                          |                              | 170                               | 385                                                 |
|         |                          |                              | 115                               | 440                                                 |
|         |                          |                              | 104                               | 451                                                 |
| 12      | Cardiovascular death     | Acute myocardial infarction  | 24                                | 676                                                 |
| 13      | Cardiovascular death     | Sudden cardiac death         | 246                               | 71                                                  |
|         |                          |                              | 186                               | 131                                                 |
|         |                          |                              | 82                                | 235                                                 |
| 14      | Non-cardiovascular death | Malignancy                   | 604                               | 3                                                   |
| 15      | Cardiovascular death     | Acute myocardial infarction  | 294                               | 512                                                 |
| 16      | Undetermined cause       |                              | 357                               | 298                                                 |
| 17      | Cardiovascular death     | Sudden cardiac death         | 358                               | 146                                                 |
|         |                          |                              | 307                               | 197                                                 |

|    |                          |                              |                   |                   |
|----|--------------------------|------------------------------|-------------------|-------------------|
|    |                          |                              | 139               | 365               |
| 18 | Undetermined cause       |                              | 212               | 517               |
| 19 | Non-cardiovascular death | Infection (including sepsis) | 368<br>340        | 78<br>106         |
| 20 | Non-cardiovascular death | Infection (including sepsis) | 407<br>305        | 360<br>462        |
| 21 | Undetermined cause       |                              | 17                | 573               |
| 22 | Cardiovascular death     | Acute myocardial infarction  | 7                 | 241               |
| 23 | Undetermined cause       |                              | 419<br>316<br>180 | 282<br>385<br>521 |
| 24 | Non-cardiovascular death | Malignancy                   | 152               | 197               |
| 25 | Cardiovascular death     | Sudden cardiac death         | 27                | 223               |
| 26 | Non-cardiovascular death | Infection (including sepsis) | 160               | 580               |
| 27 | Cardiovascular death     | Sudden cardiac death         | 822               | 33                |
| 28 | Non-cardiovascular death | Other non-cardiovascular     | 288               | 148               |
| 29 | Cardiovascular death     | Sudden cardiac death         | 412               | 161               |
| 30 | Non-cardiovascular death | Pulmonary causes             | 753<br>426        | 31<br>358         |
| 31 | Cardiovascular death     | Heart failure                | 326               | 107               |
| 32 | Non-cardiovascular death | Infection (including sepsis) | 15                | 92                |
| 33 | Non-cardiovascular death | Malignancy                   | 454<br>85         | 79<br>448         |
| 34 | Non-cardiovascular death | Other non-cardiovascular     | 525<br>522        | 10<br>13          |
| 35 | Undetermined cause       |                              | 20                | 75                |
| 36 | Non-cardiovascular death | Infection (including sepsis) | 290<br>289        | 190<br>191        |

|    |                          |                      |    |     |
|----|--------------------------|----------------------|----|-----|
| 37 | Non-cardiovascular death | Pulmonary causes     | 46 | 398 |
|    |                          |                      | 38 | 406 |
| 38 | Cardiovascular death     | Sudden cardiac death | 86 | 402 |

Cause of death determined by the Event Adjudication Committee

**ESM Fig. 1: Time to first Event Adjudication Committee-confirmed major adverse cardiovascular event and prior severe hypoglycaemia by patient**

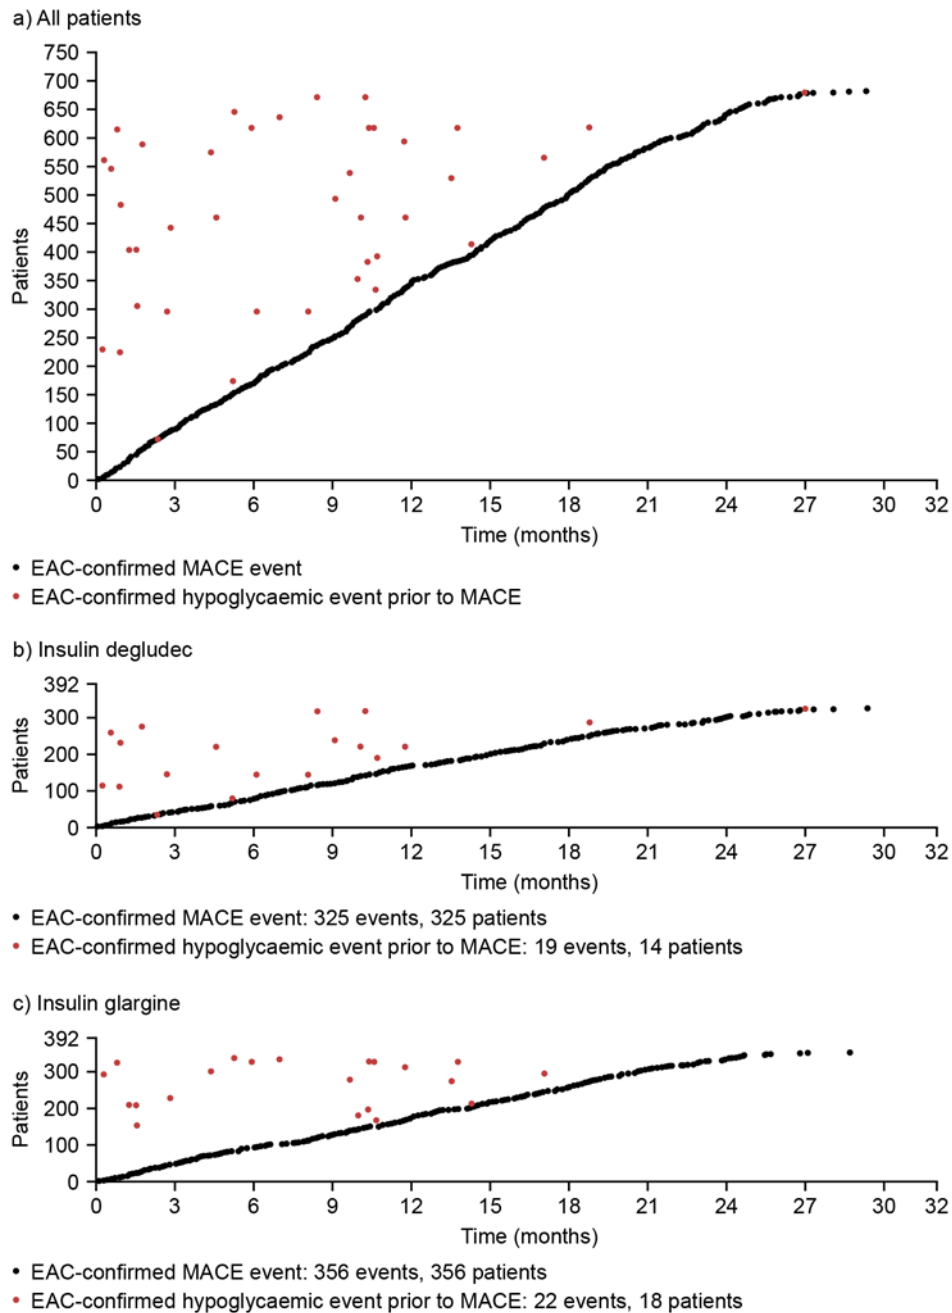

Events for all patients are shown in panel (a) and are split by treatment arm in panels (b) and (c). EAC, Event Adjudication Committee; MACE, major adverse cardiovascular event
